# Supplementary material for: High glucose contributes to the proliferation and migration of non-small-cell lung cancer cells via GAS5-TRIB3 axis
Source: PubMed Central journal article supplement (PMC5857909; doi:10.1042/bsr20171014), 2018-03-16

c

**supplemental Figure 1** GAS5 potentiated TRIB3 protein ubiquitination. The NSCLC cell lines (PC-9 and H1299) were co-transfected with pcDNA-GAS5, My-TRIB3, HA-ubiquitin (Ub) and then treated with MG132 (10 $\mu$ M) for 6 hours. Western blot was performed to analyze the level of the endogenous TRIB3-associated ubiquitination and TRIB3 protein.

**supplemental Figure 2** GAS5 attenuated the HG-induced anti-apoptosis of NSCLC cells without altering cell cycle. NSCLC cells were divided into 5 experimental groups: LG (low glucose treatment), HG (high glucose treatment), HG+pcDNA (transfection of pcDNA and high glucose treatment), HG+pcDNA-GAS5 (transfection of pcDNA-GAS5 and high glucose treatment) and HG+pcDNA-GAS5+pcDNA-TRIB3 (co-transfection of pcDNA-GAS5 and pcDNA-TRIB3, and high glucose treatment). **(A)** The cell cycle and **(B)** apoptosis of NSCLC cells were detected using Flow cytometry. \*P<0.05 vs. LG; #P<0.05 vs. HG + pcDNA; &P<0.05 vs. HG + pcDNA-GAS5.

**H1299**

**PC-9**

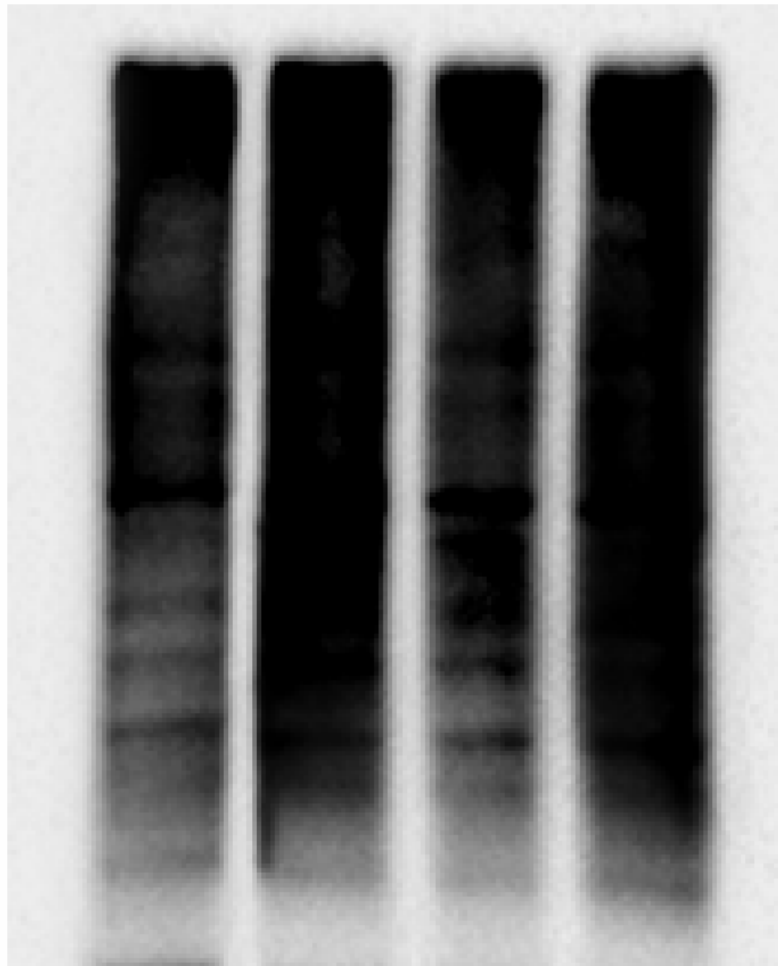

**Ubs-TRIB3**

**TRIB3**

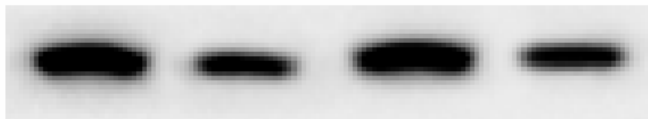

**$\beta$ -actin**

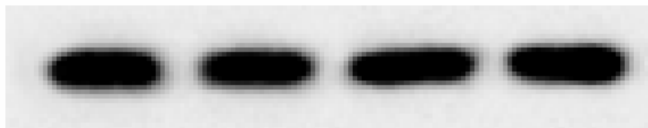

**My-TRIB3**

**+ + + +**

**HA-Ub**

**+ + + +**

**SLAH1**

**+ + + +**

**MG132**

**+ + + +**

**pcDNA**

**+ - + -**

**pcDNA-GAS5**

**- + - +**

**A**

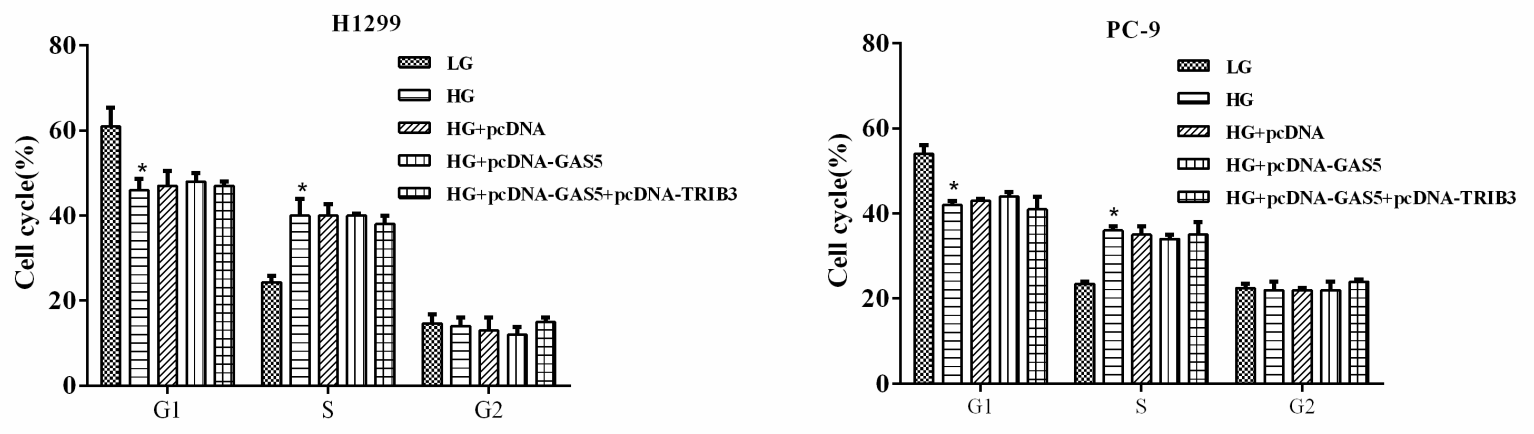

**B**

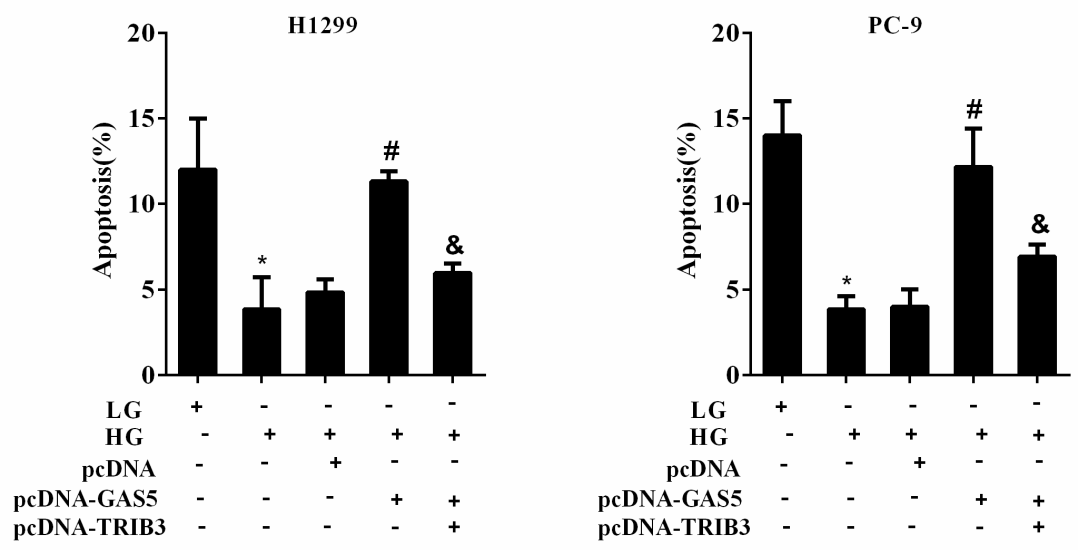

Supplement: bsr20171014_Supp1.pdf [file bsr20171014_Supp1.pdf]
